# Supplementary material for: Oncolytic Herpes Simplex Virus Vector G47Δ in Combination with Androgen Ablation for the Treatment of Human Prostate Adenocarcinoma
Source: Oxford University Press journal article supplement (doi:10.1158/1078-0432.ccr-05-1090), 2005-11-01
Supplement: 10780432ccr051090-sup-supplementary_figure_1.pdf [file 10780432ccr051090-sup-supplementary_figure_1.pdf]

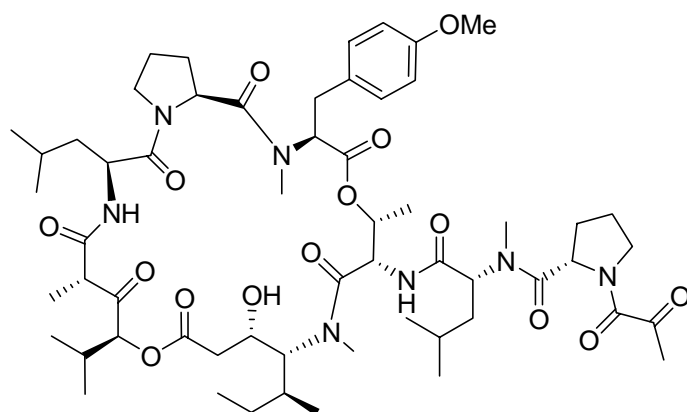

Supplementary Figure 1: Chemical structure of Plitidepsin (Aplidin TM).

See also Cárdenas et al. J Org Chem 2003 68: 9554-9562, and references therein.

Plitidepsin is the nonproprietary name for AplidinTM.

<http://www.who.int/medicines/organization/qsm/activities/qualityassurance/inn/orginn.shtml>
